# Supplementary material for: MoS2–reduced graphene oxide composites synthesized via a microwave-assisted method for visible-light photocatalytic degradation of methylene blue
Source: Royal Society of Chemistry journal article supplement (doi:10.1039/c3ra46956e), 2014-01-01
Supplement: c3ra46956e1.pdf [file c3ra46956e1.pdf]

## MoS<sub>2</sub>-reduced graphene oxide composites synthesized via microwave-assisted method for visible-light photocatalytic degradation of methylene blue

Jinliang Li<sup>a</sup>, Xinjuan Liu<sup>b</sup>, Likun Pan <sup>\*a</sup>, Wei Qin<sup>a</sup>, Taiqiang Chen<sup>a</sup> and Zhuo Sun<sup>a</sup>

<sup>a</sup> Engineering Research Center for Nanophotonics & Advanced Instrument, Ministry of Education, Shanghai Key Laboratory of Magnetic Resonance, Department of Physics, East China Normal University, Shanghai 200062, China, Fax: +86 21 62234321; Tel: +86 21 62234132; E-mail: lkpan@phy.ecnu.edu.cn

<sup>b</sup> Shanghai Nanotechnology Promotion Center, Shanghai 200237 China.

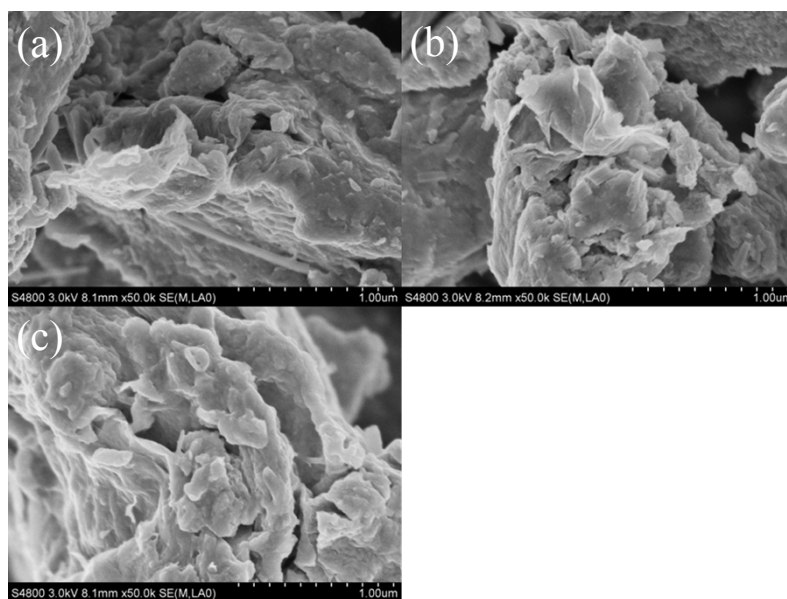

**Fig. S1** Surface morphologies of (a) MG-1, (b) MG-3, (c) MG-4 by FESEM measurement.
